# Supplementary material for: Long non-coding RNA ARAP1-AS1 accelerates cell proliferation and migration in breast cancer through miR-2110/HDAC2/PLIN1 axis
Source: PubMed Central journal article supplement (PMC7197975; doi:10.1042/bsr20191764), 2020-04-23
Supplement: BSR-2019-1764_supp.pdf [file BSR-2019-1764_supp.pdf]

A

| Gene      | miRNA             | Score | DIANA Links  |
|-----------|-------------------|-------|--------------|
| ARAP1-AS1 | hsa-miR-365a-5p   | 0.929 | mT TB InE mP |
| ARAP1-AS1 | hsa-miR-6810-5p   | 0.889 | mT TB InE mP |
| ARAP1-AS1 | hsa-miR-4652-5p   | 0.881 | mT TB InE mP |
| ARAP1-AS1 | hsa-miR-365b-5p   | 0.878 | mT TB InE mP |
| ARAP1-AS1 | hsa-miR-3191-3p   | 0.858 | mT TB InE mP |
| ARAP1-AS1 | hsa-miR-4735-3p   | 0.848 | mT TB InE mP |
| ARAP1-AS1 | hsa-miR-2110      | 0.823 | mT TB InE mP |
| ARAP1-AS1 | hsa-miR-450a-2-3p | 0.820 | mT TB InE mP |
| ARAP1-AS1 | hsa-miR-6857-5p   | 0.820 | mT TB InE mP |
| ARAP1-AS1 | hsa-miR-4446-3p   | 0.745 | mT TB InE mP |
| ARAP1-AS1 | hsa-miR-149-3p    | 0.727 | mT TB InE mP |
| ARAP1-AS1 | hsa-miR-4663      | 0.722 | mT TB InE mP |
| ARAP1-AS1 | hsa-miR-6770-5p   | 0.704 | mT TB InE mP |

B

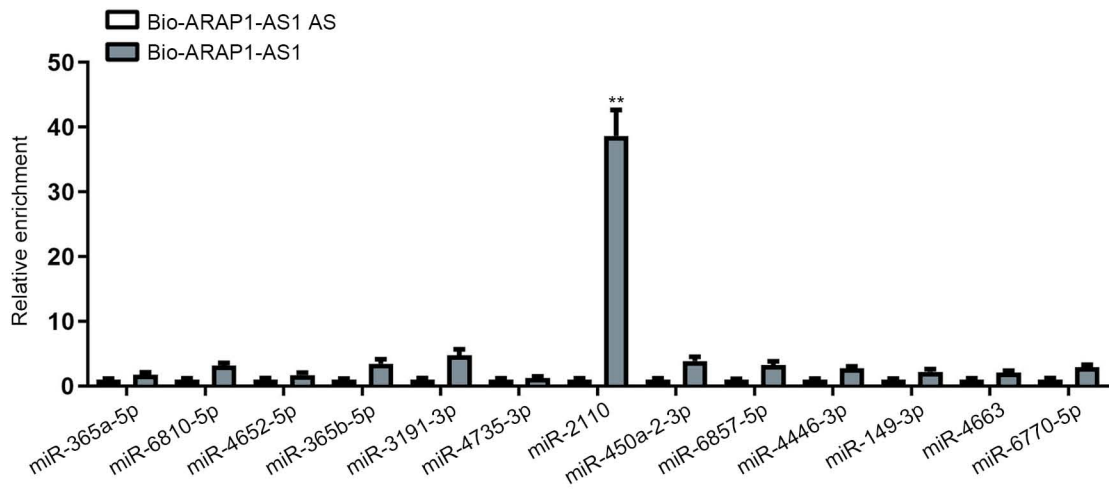

**Supplementary Figure 1** (A) A group of miRNAs that might bind with ARAP1-AS1 were obtained through DIANA Tools. (B) RNA pull down assay detected the enrichment of the miRNAs in bio-ARAP1-AS1 (sense) and bio-ARAP1-AS1 AS (anti-sense) groups. \*\* P<0.01.

A

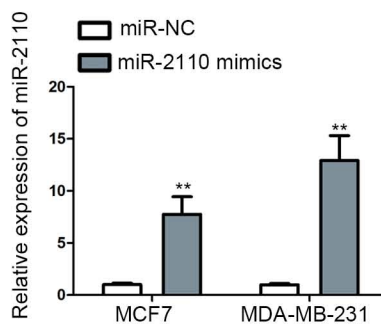

B

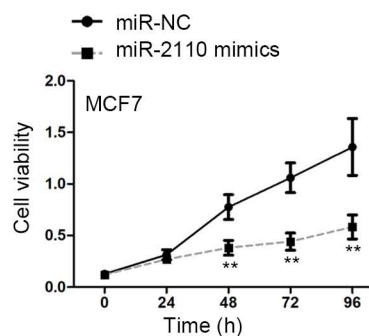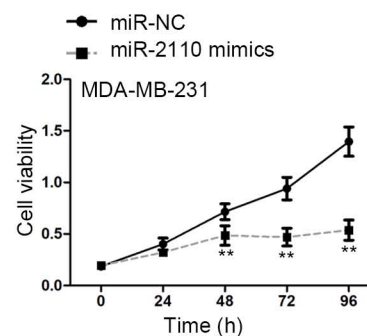

C

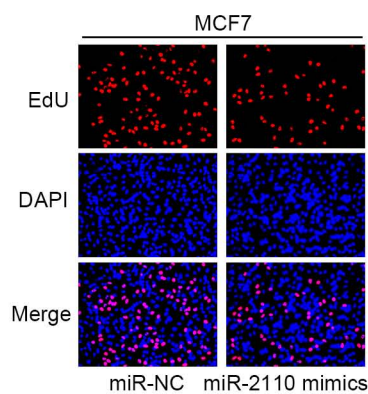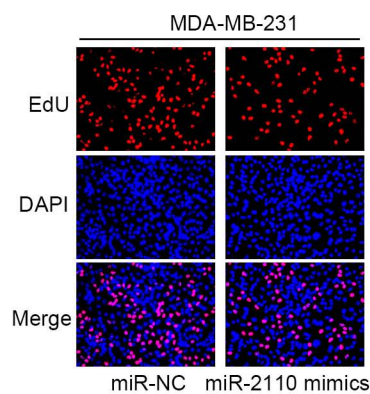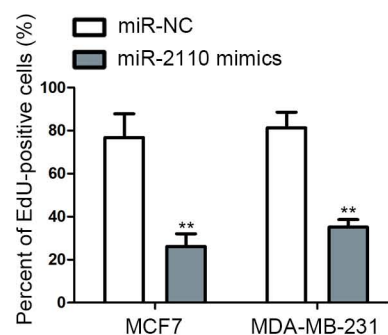

D

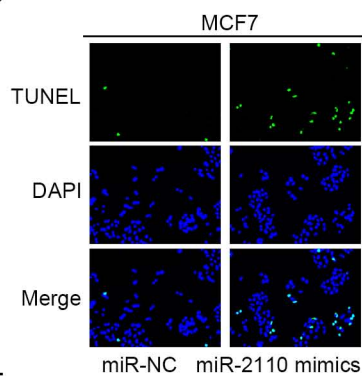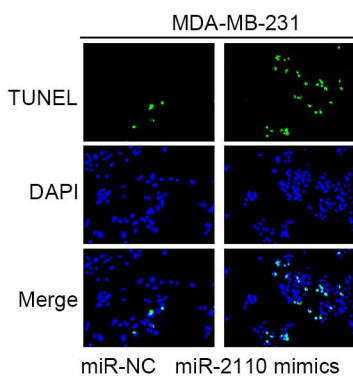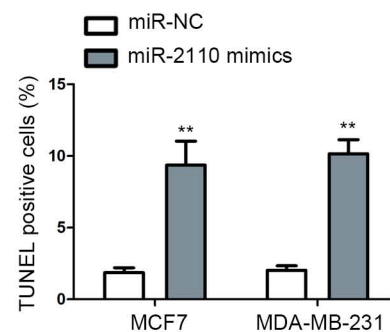

E

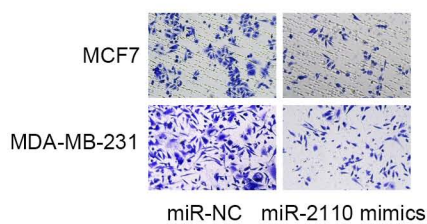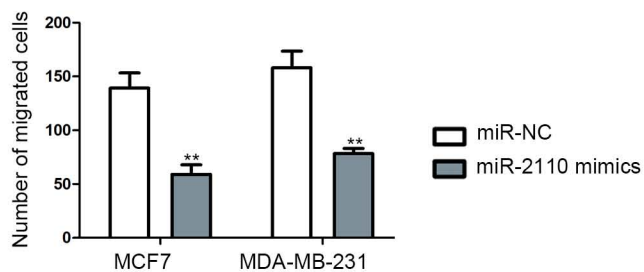

**Supplementary Figure 2** (A) The overexpression efficiency of miR-2110 was evaluated by qRT-PCR. (B-C) BC cell viability and proliferation abilities were measured by CCK-8 and EdU assays. (D) BC cell apoptosis was tested by TUNEL assay. (E) BC cell migration ability was detected by transwell assay. \*\*  $P < 0.01$ .

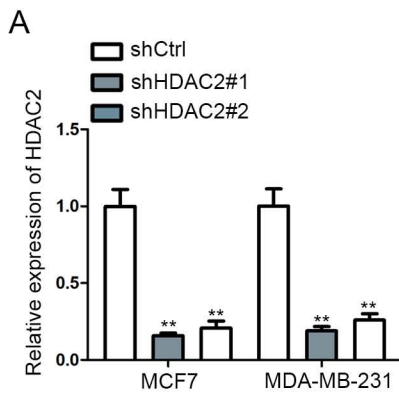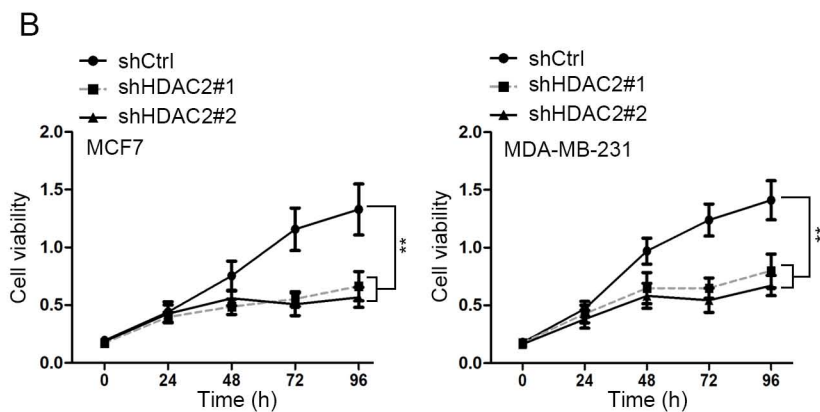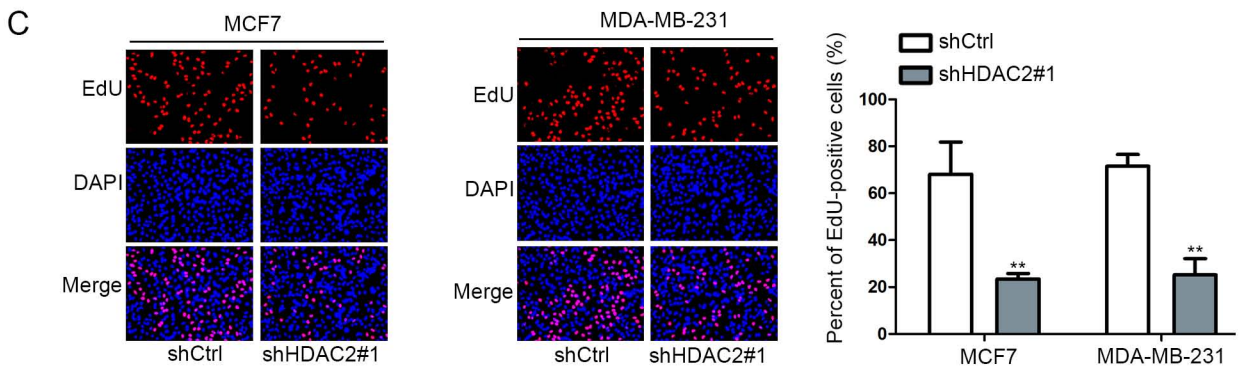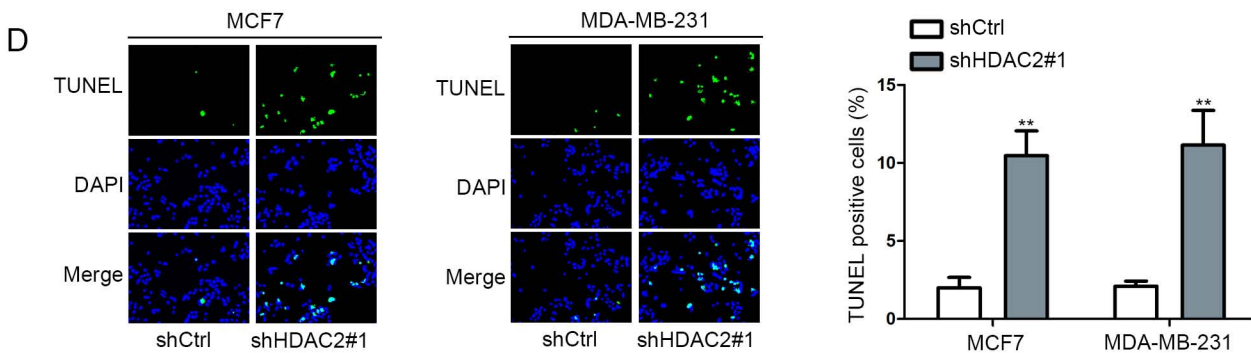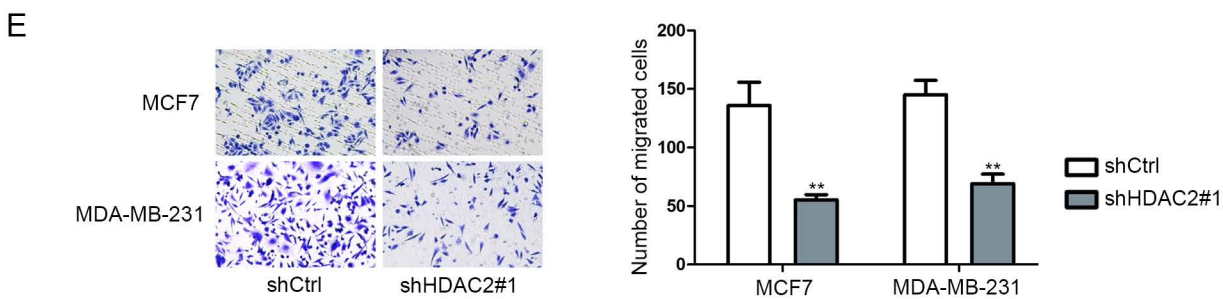

**Supplementary Figure 3** (A) The knockdown efficiency of HDAC2 was evaluated by qRT-PCR. (B-C) BC cell viability and proliferation abilities were measured by CCK-8 and EdU assays. (D) BC cell apoptosis was tested by TUNEL assay. (E) BC cell migration ability was detected by transwell assay. \*\*  $P < 0.01$ .
